# Supplementary material for: Deep learning applied to glacier evolution modelling
Source: Copernicus journal article supplement (doi:10.5194/tc-2019-163), 2019-07-26

## Glacier Mer de Glace 1

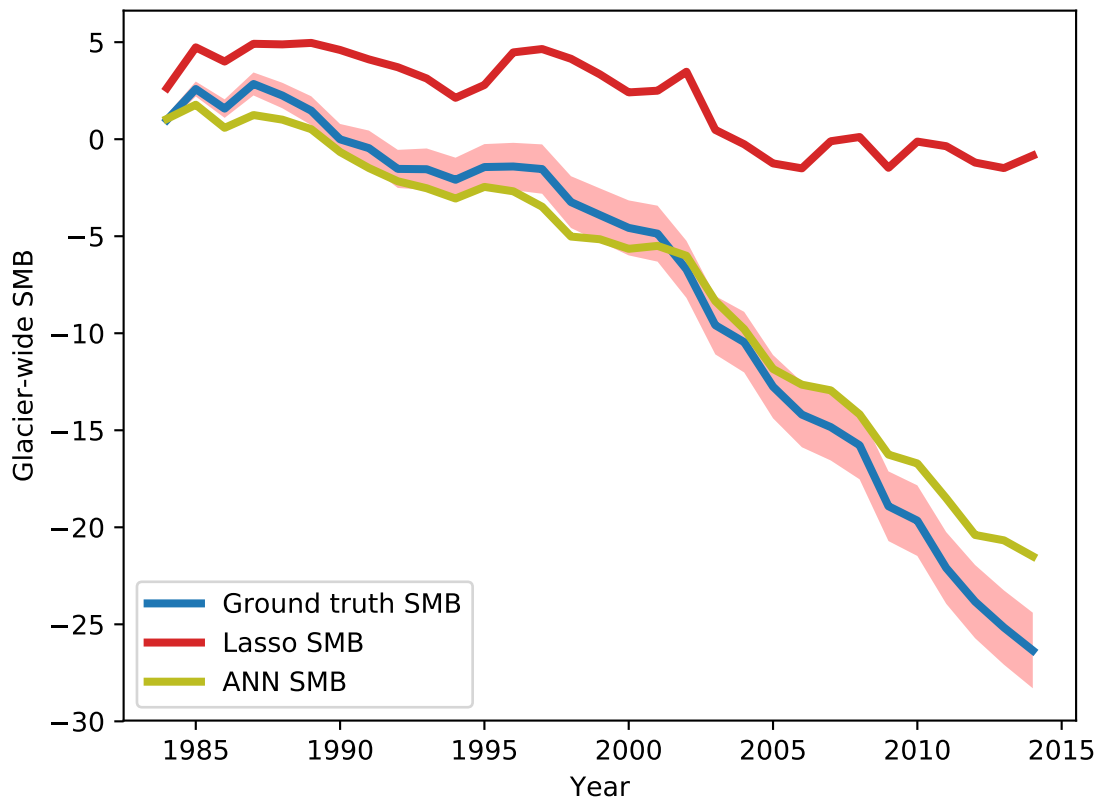

## Glacier des Quirlies

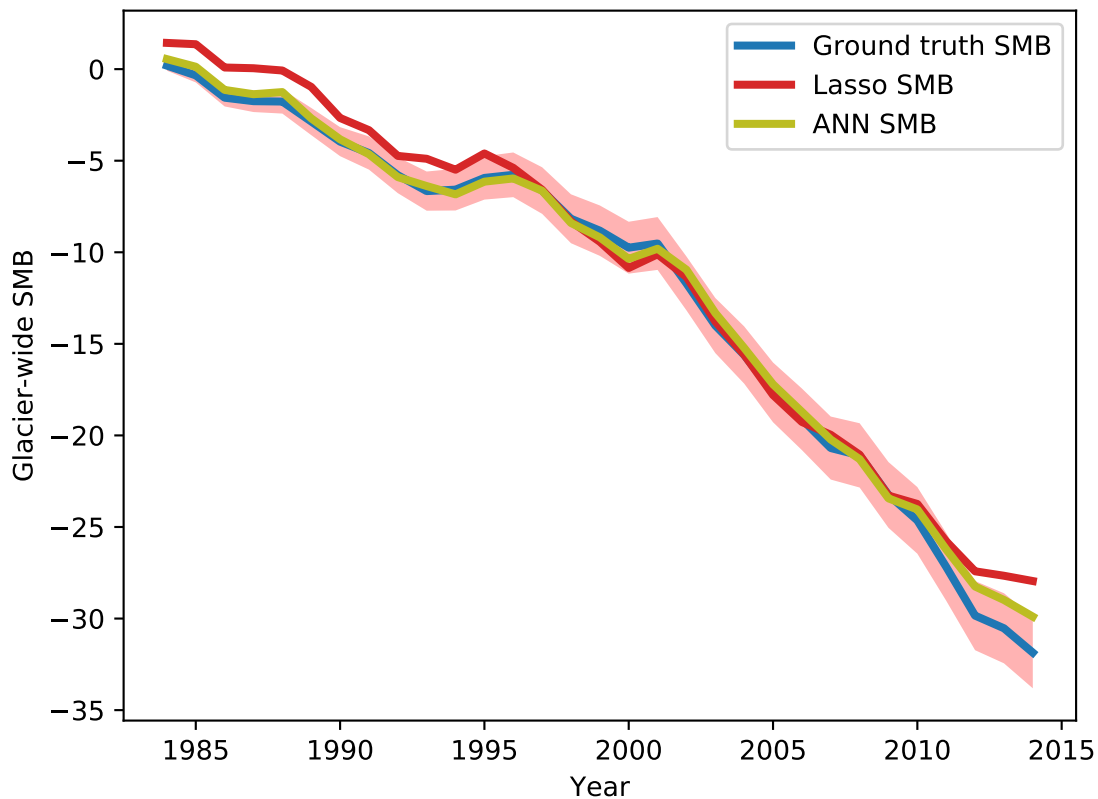

## Glacier Saint Sorlin

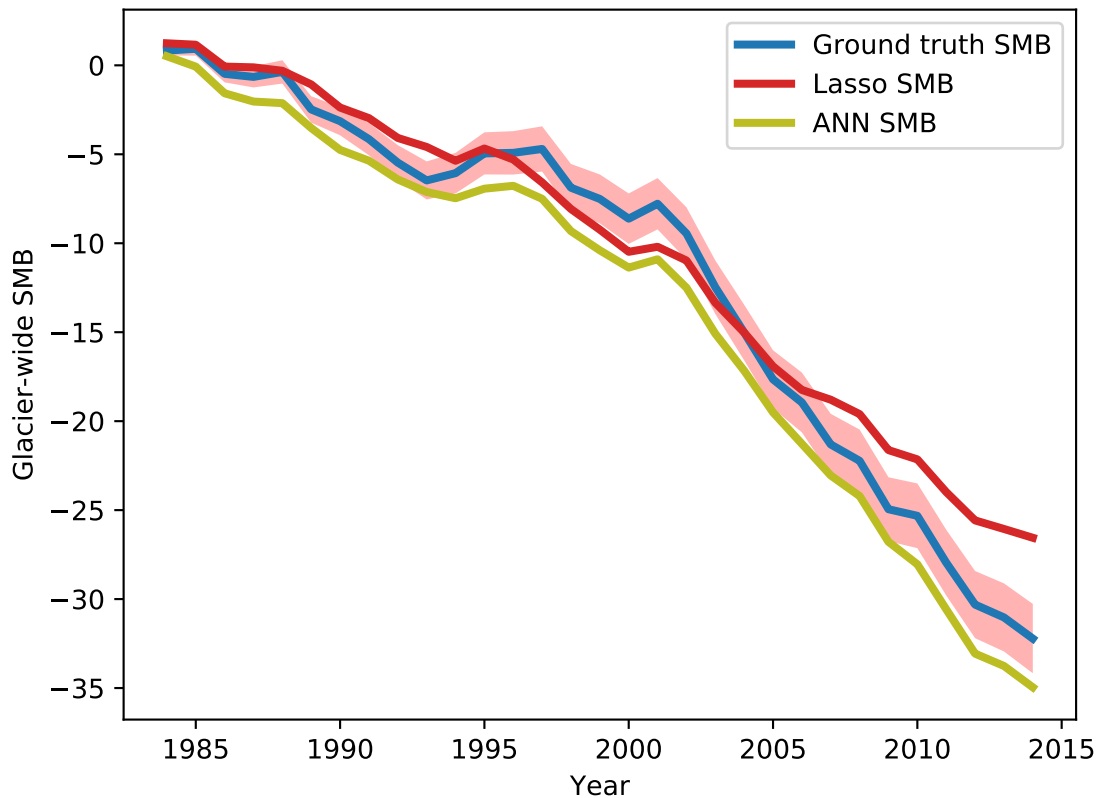

## Glacier des Rouies

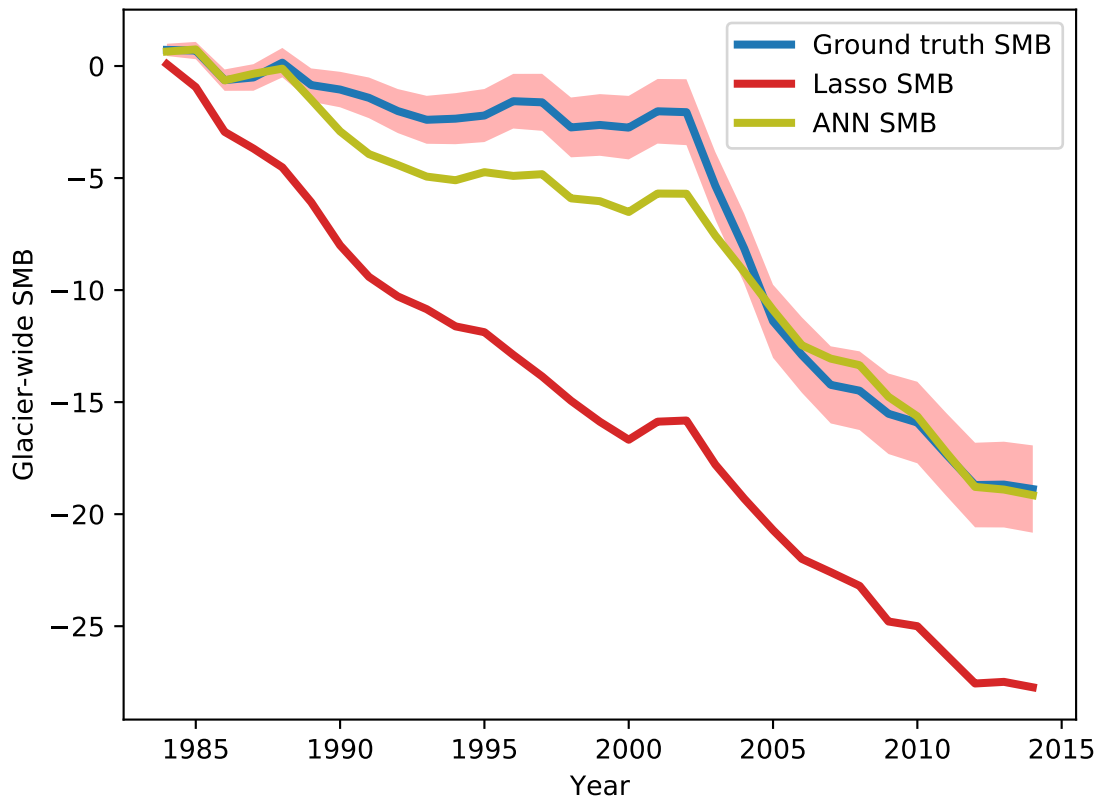

## Glacier de la Pilatte

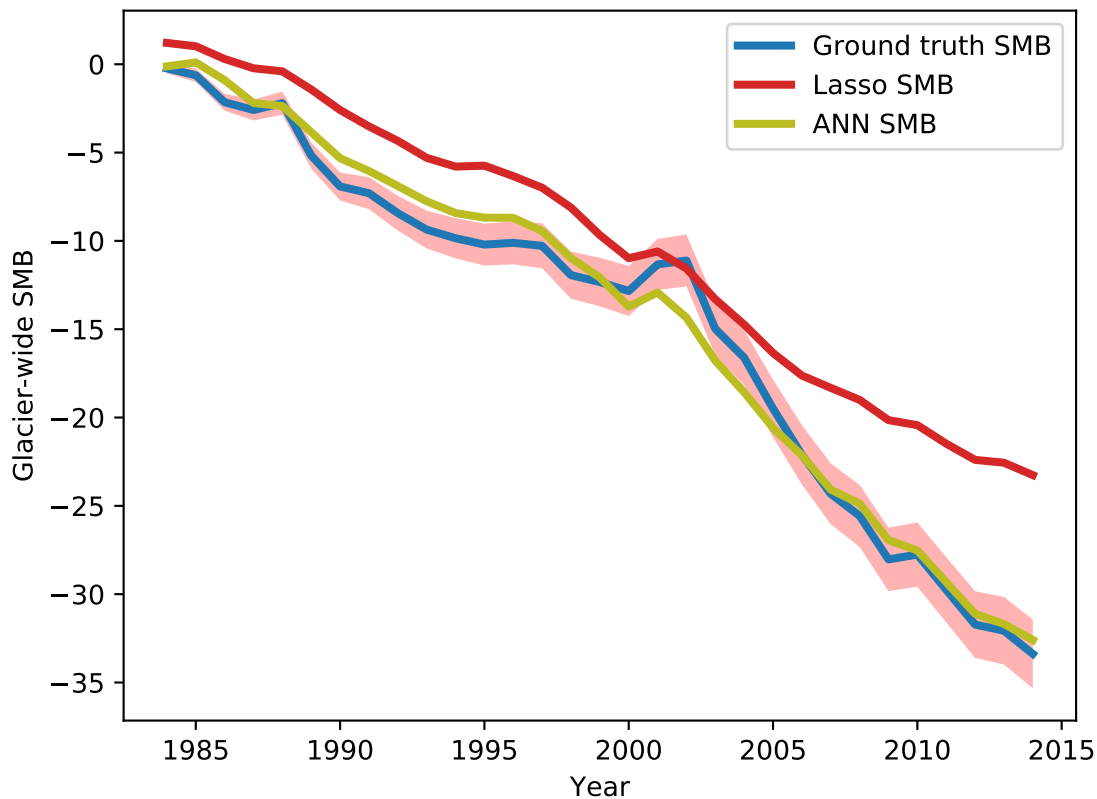

## Glacier du Sele

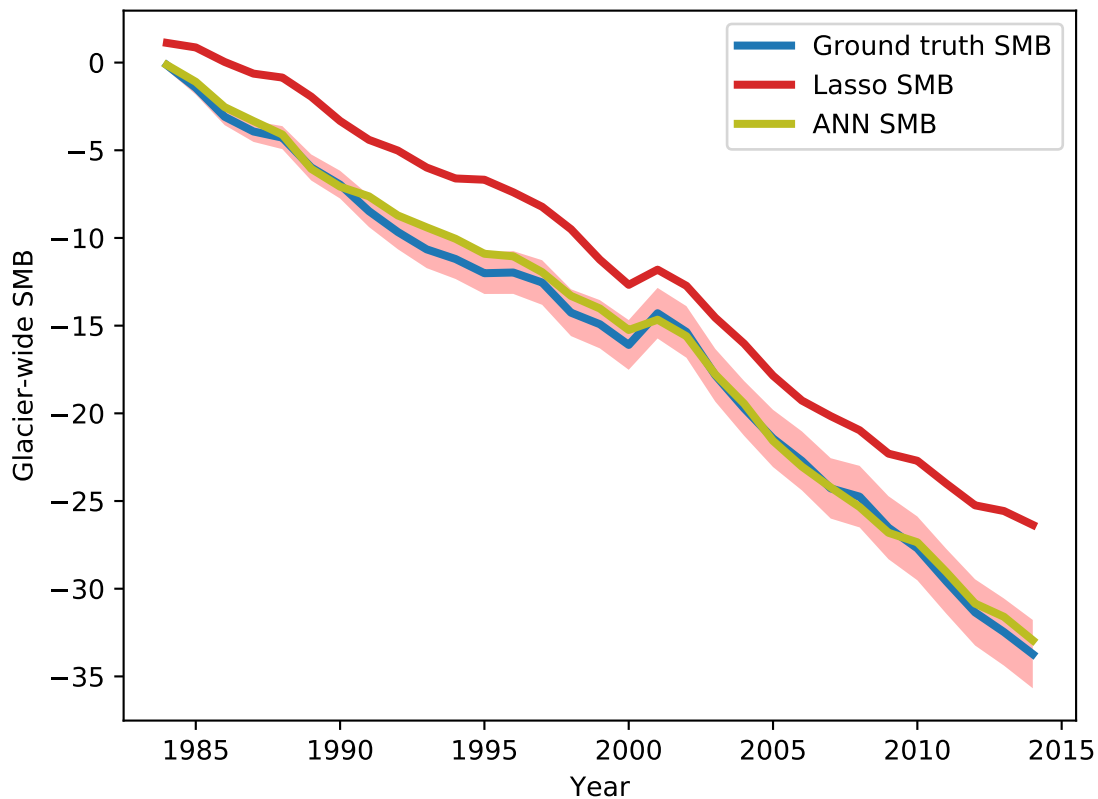

## Glacier du vallon de la Pilatte

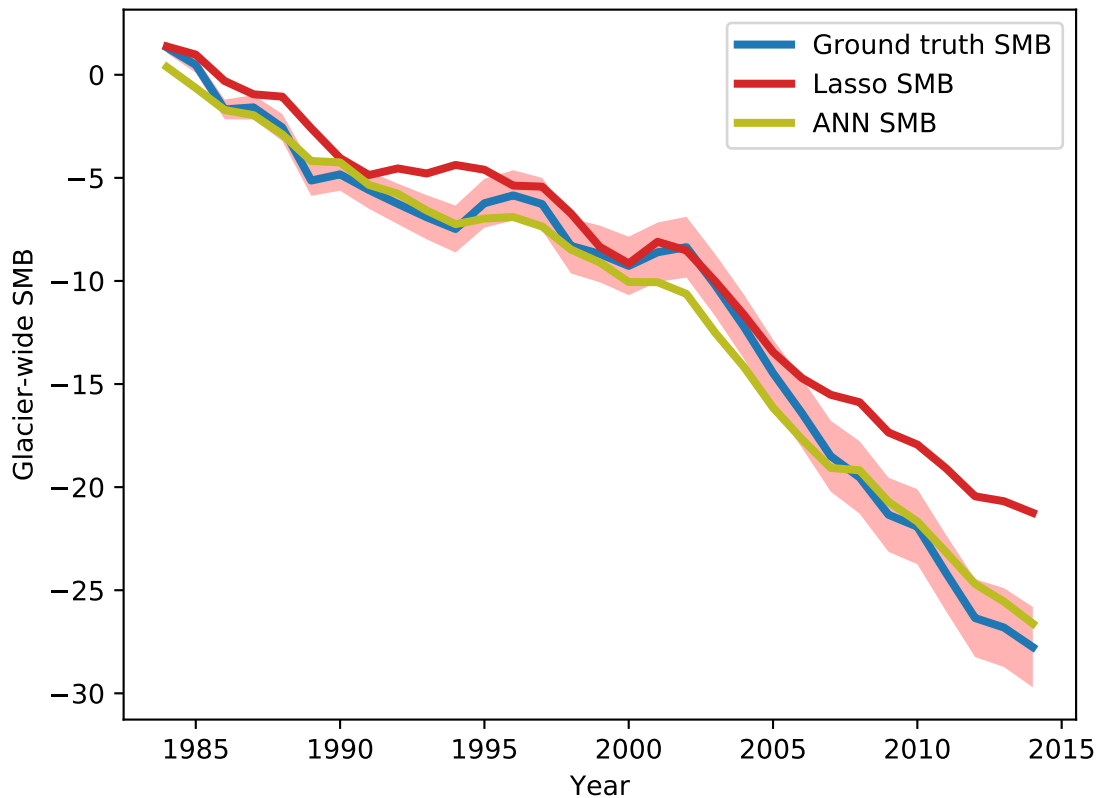

## Glacier Blanc

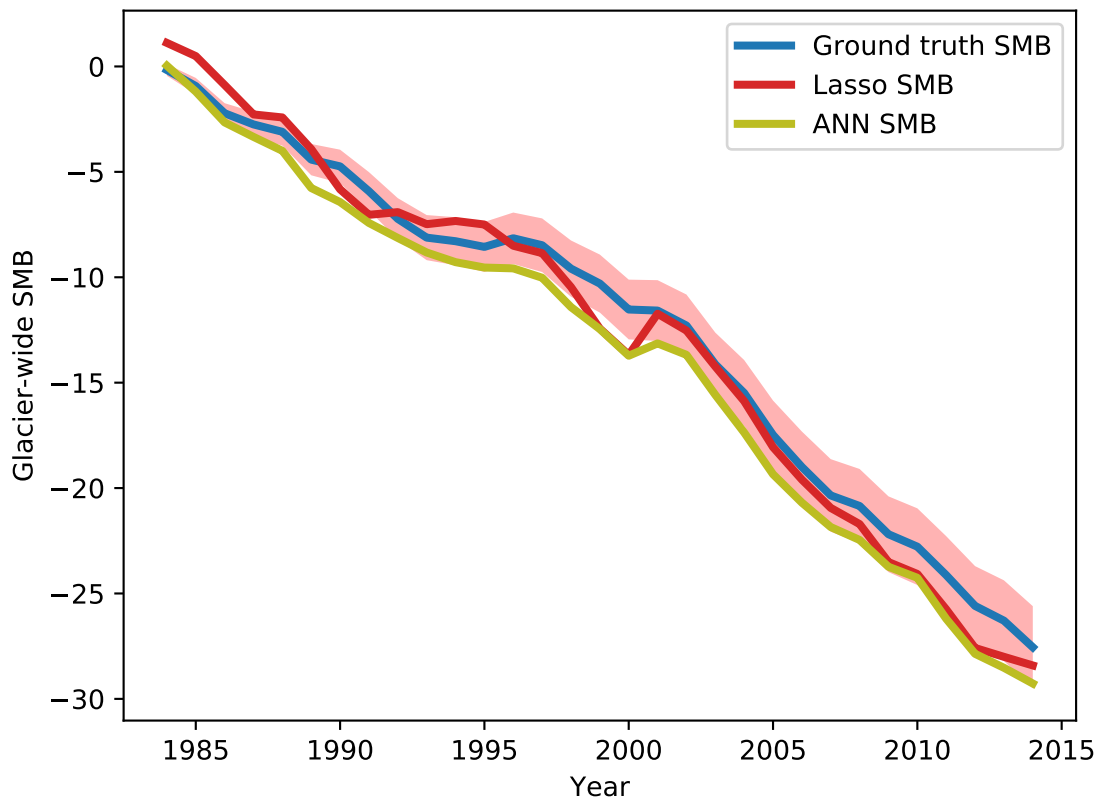

## Glacier du Casset

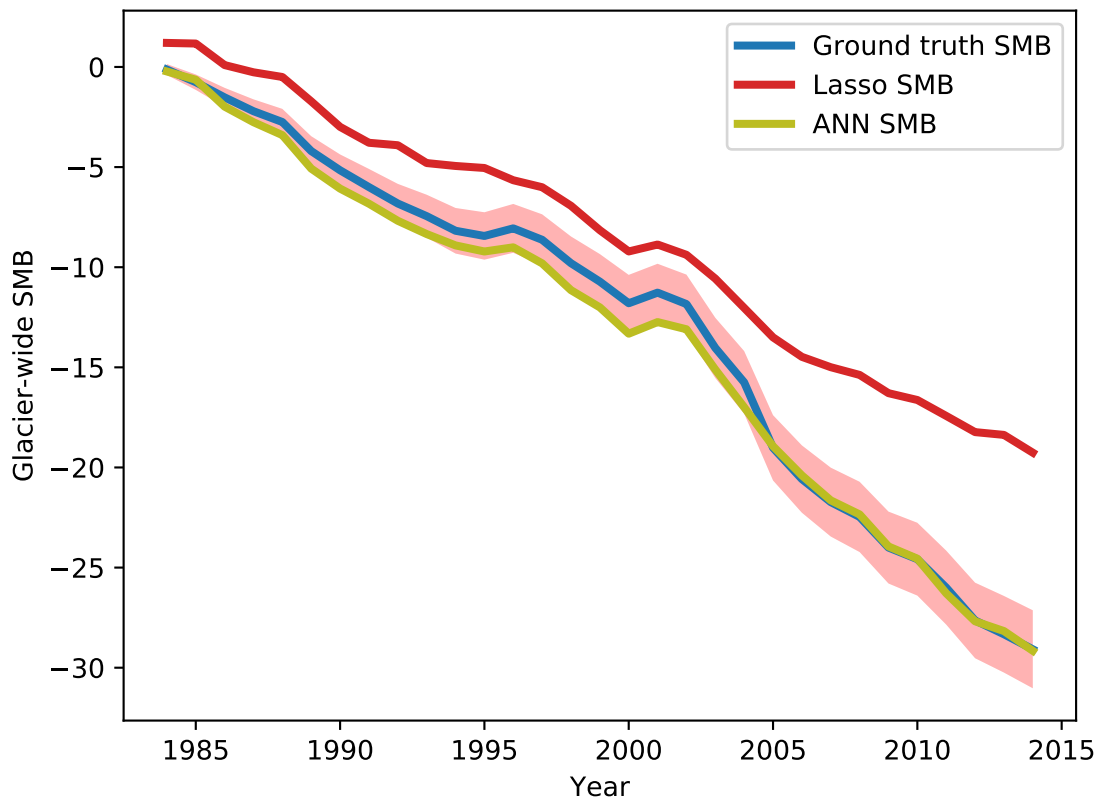

## Glacier de la Selle

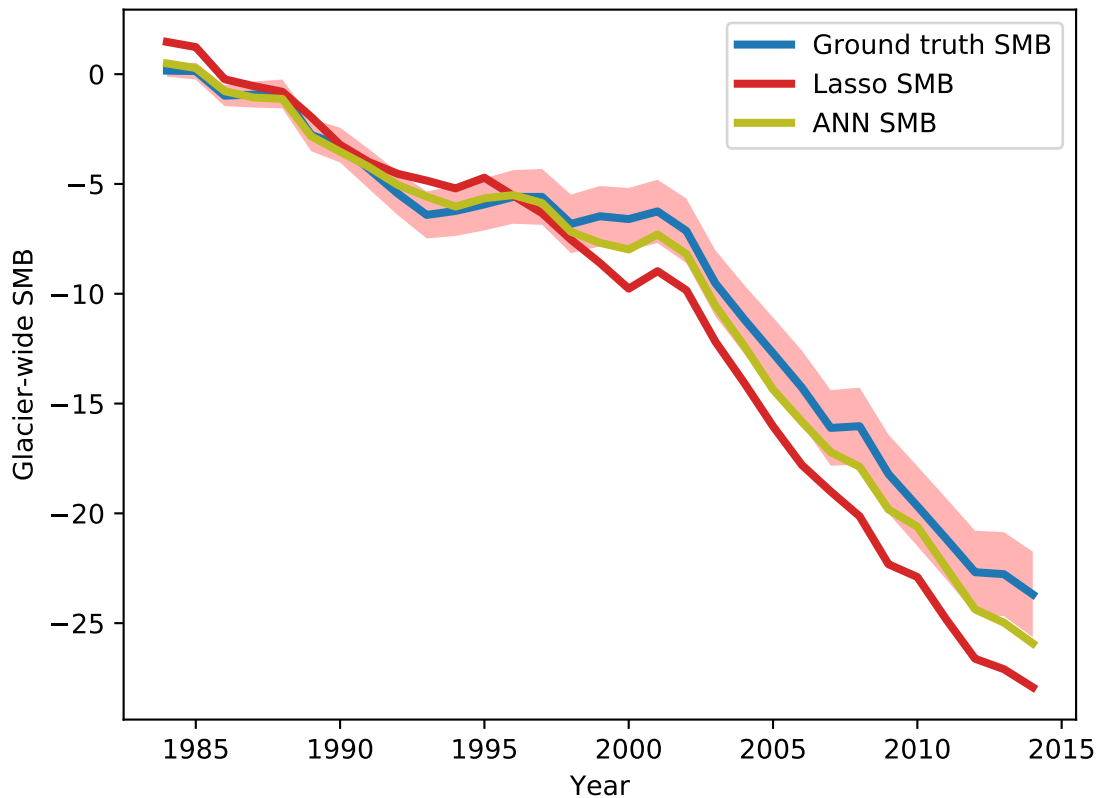

## Glacier de Mont de Lans

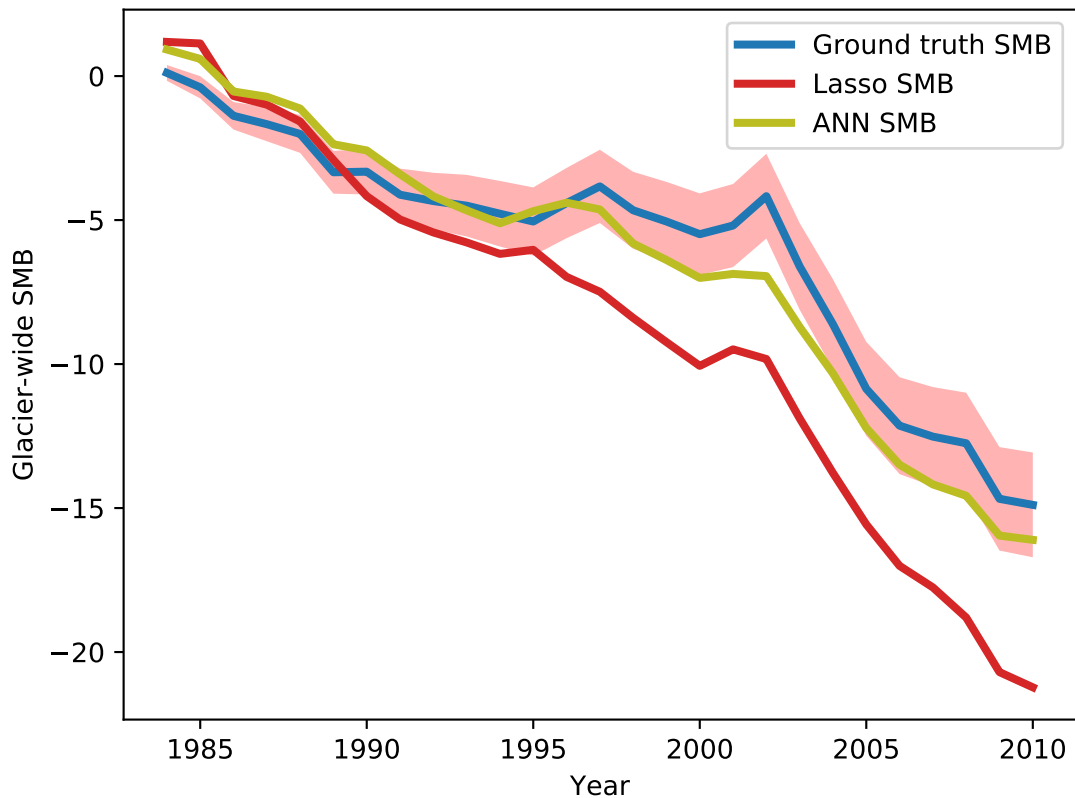

## Glacier de la Girose

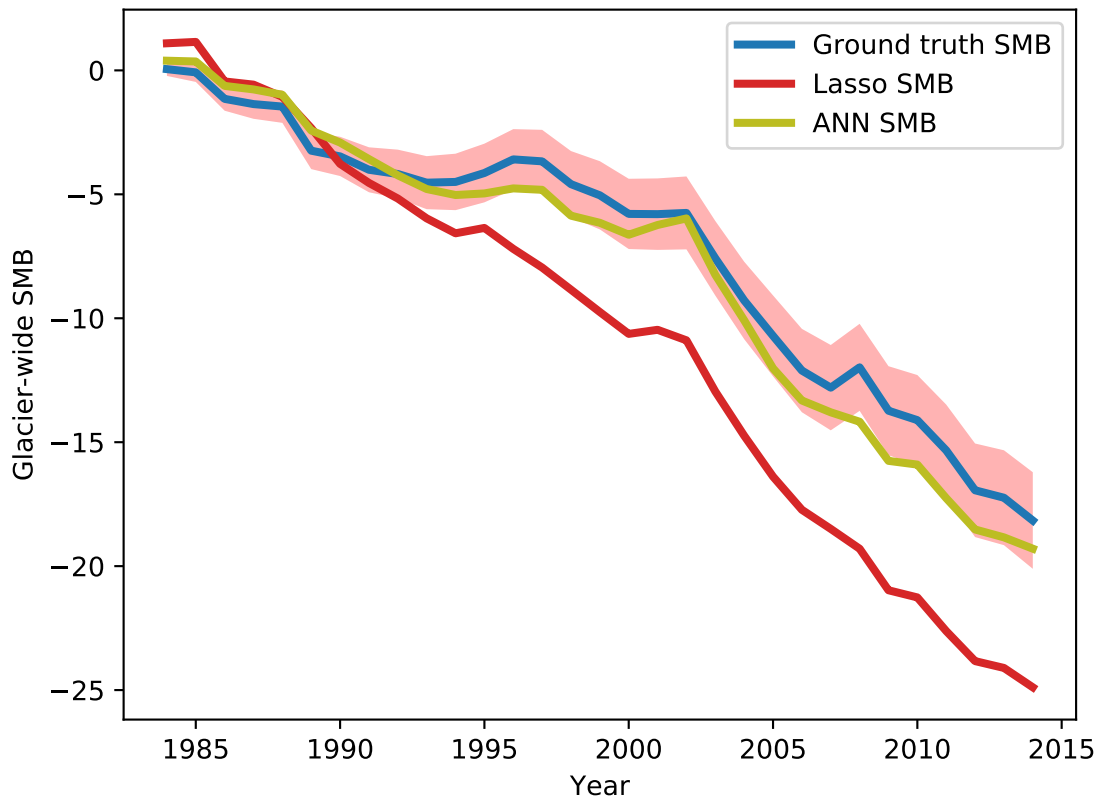

## Glacier du Lautaret

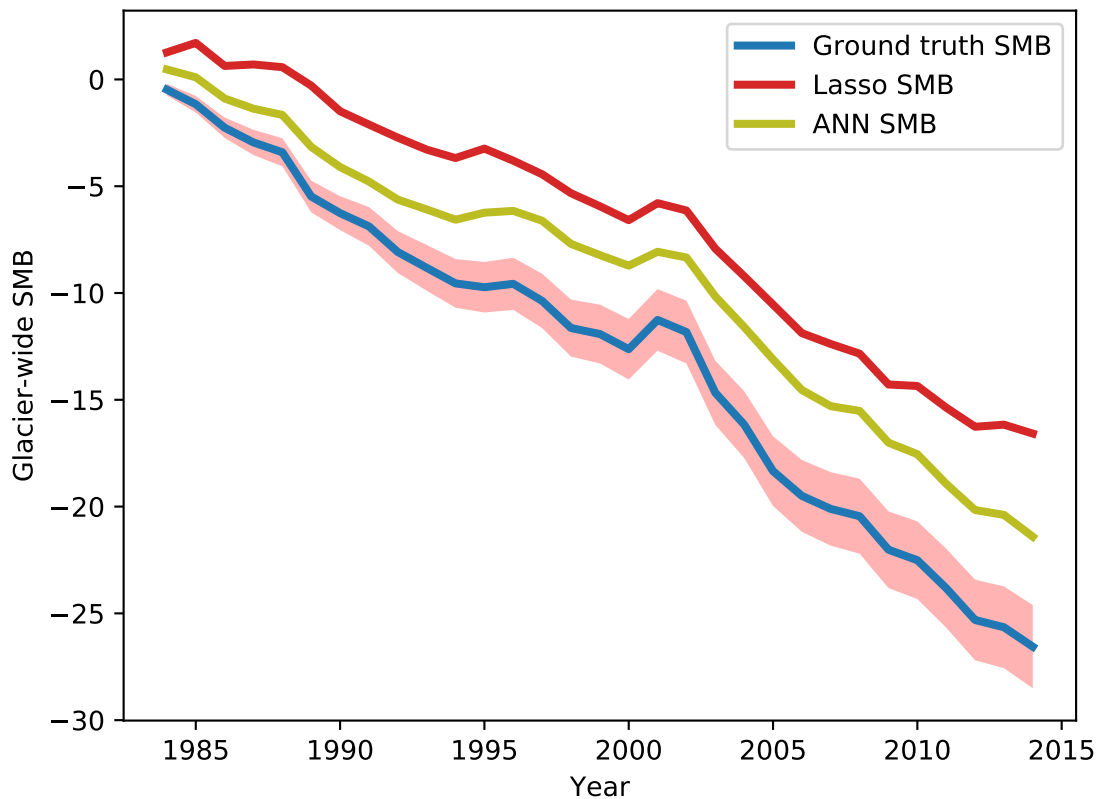

## Glacier de Gebroulaz

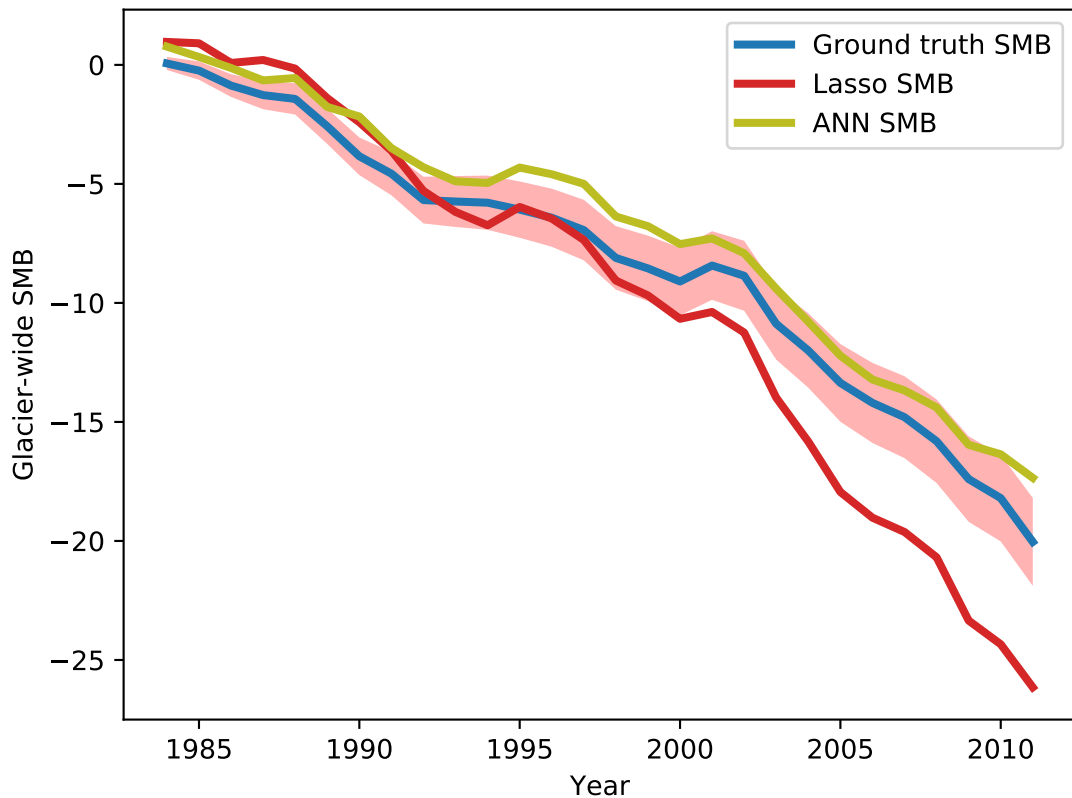

## Glacier de l'Arpont

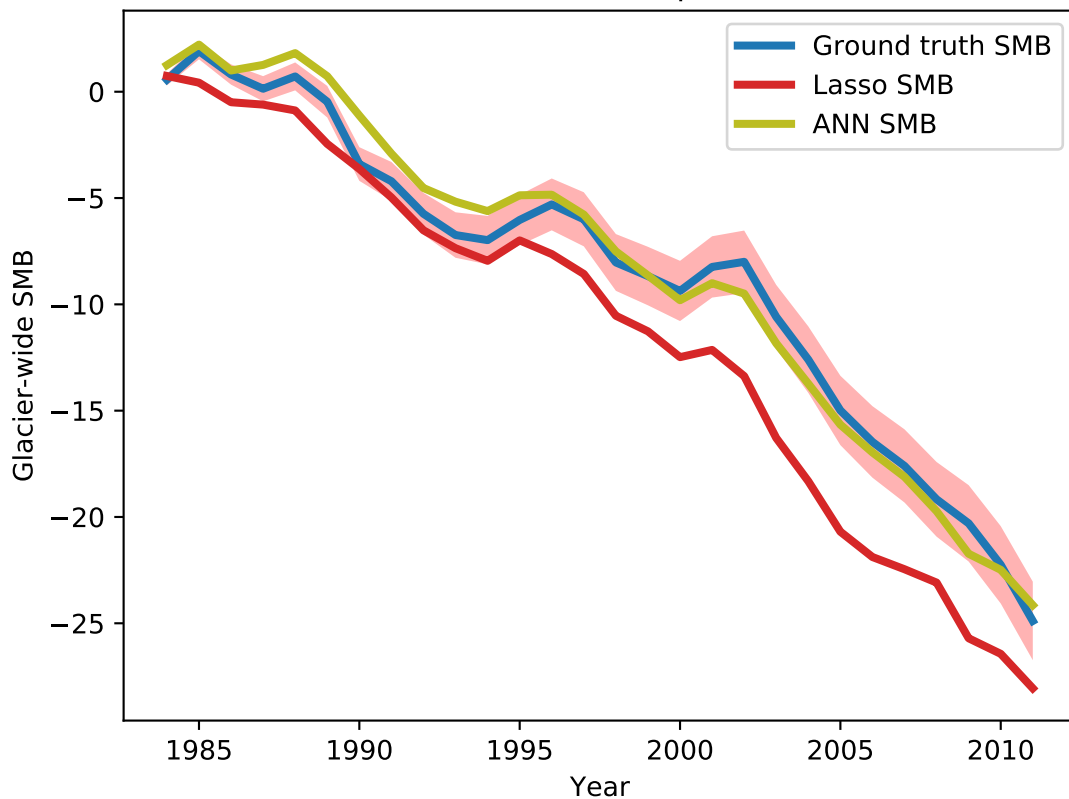

## Glacier du Pelve 1

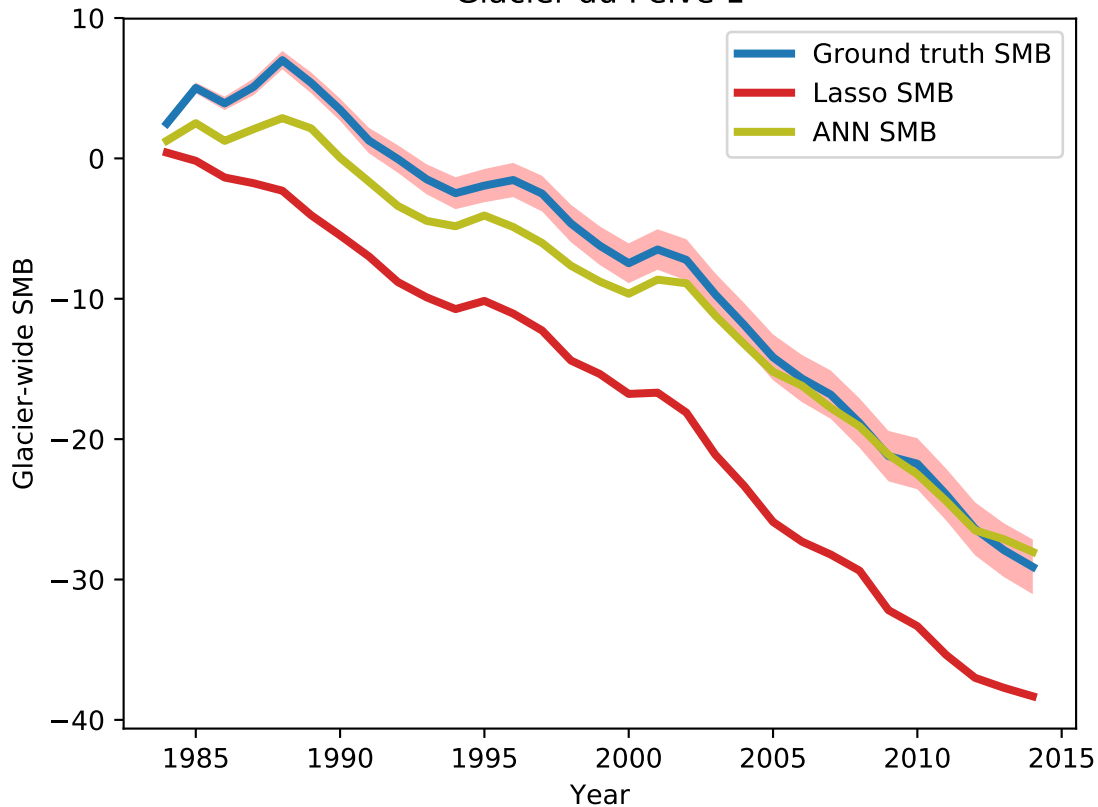

## Glacier de l'Arcellin - Roche Ferran 1

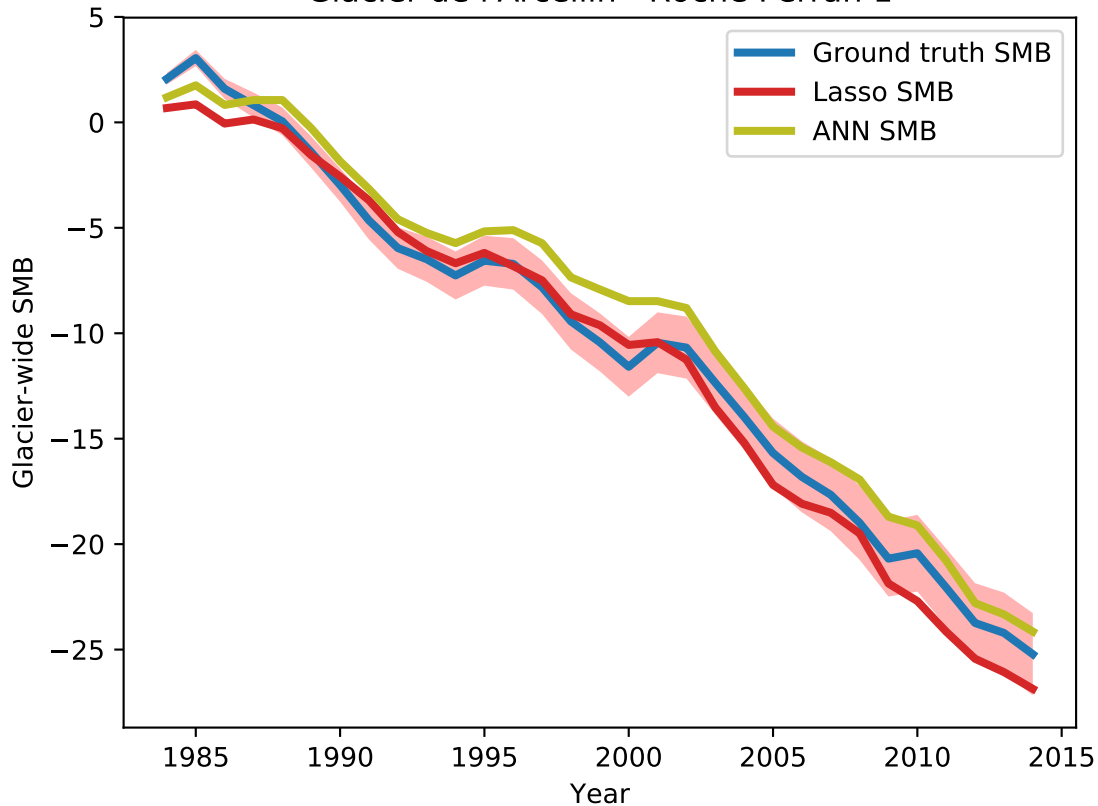

# Glacier de la Mahure 1

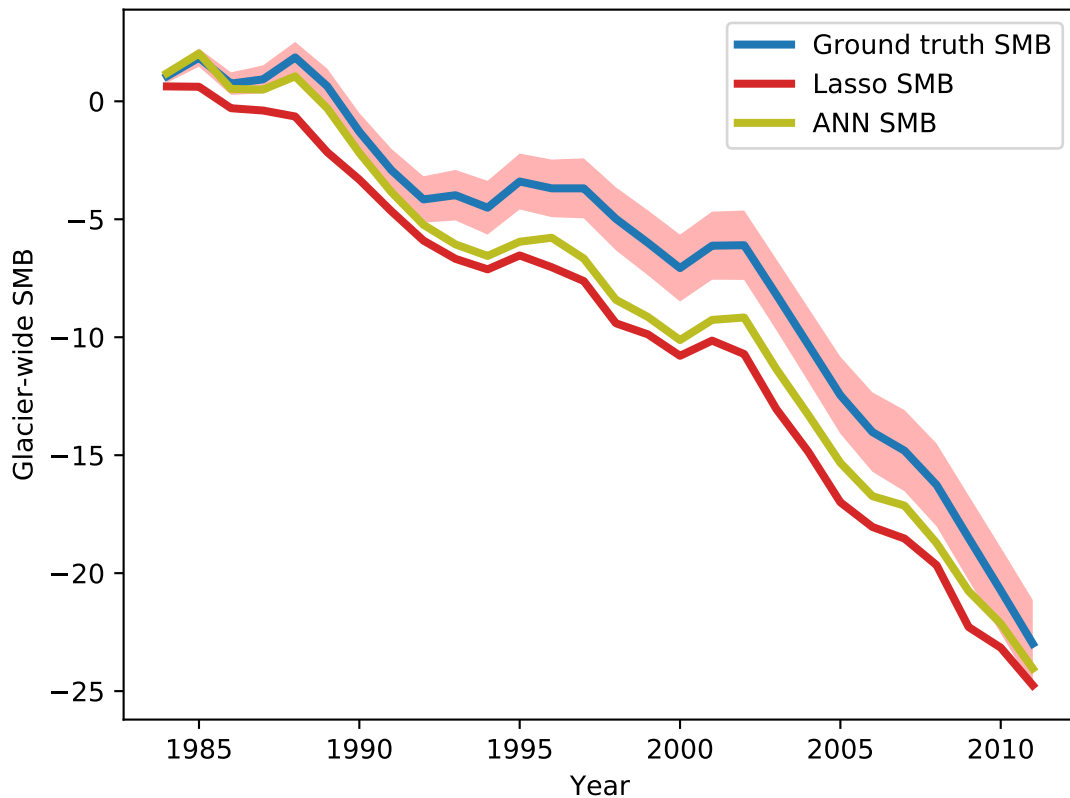

## Glacier de la Grande Motte

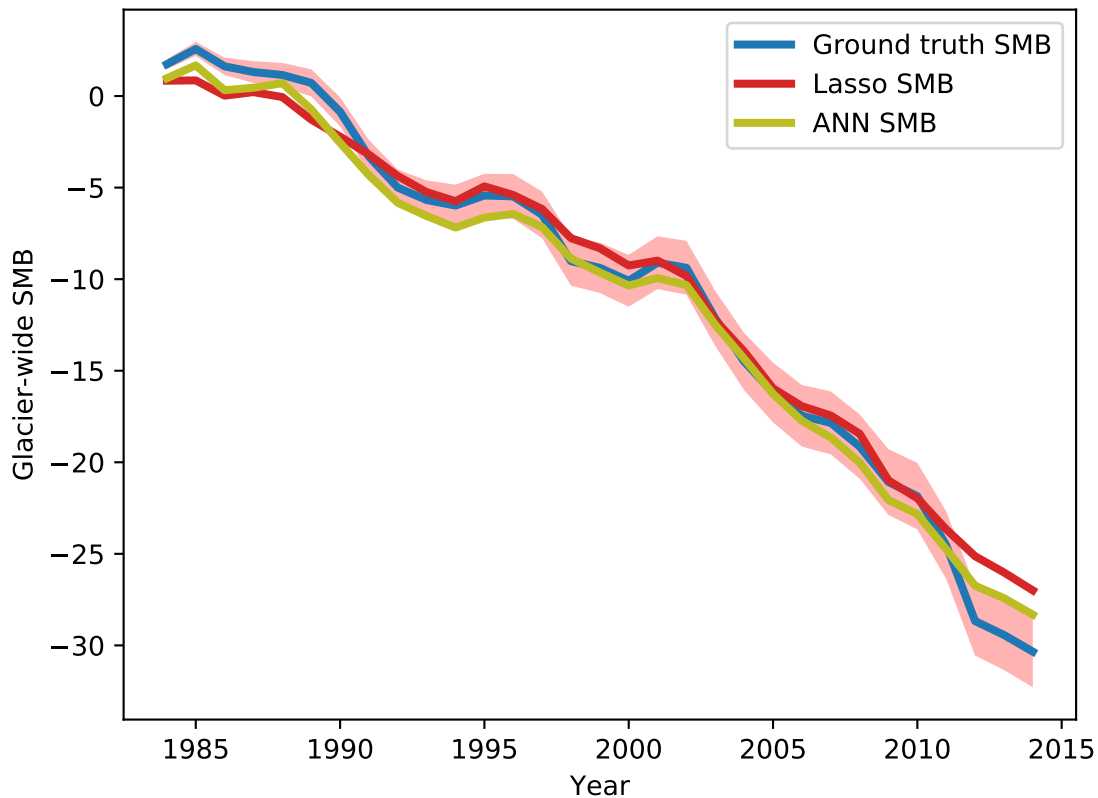

## Glacier du Vallonnet

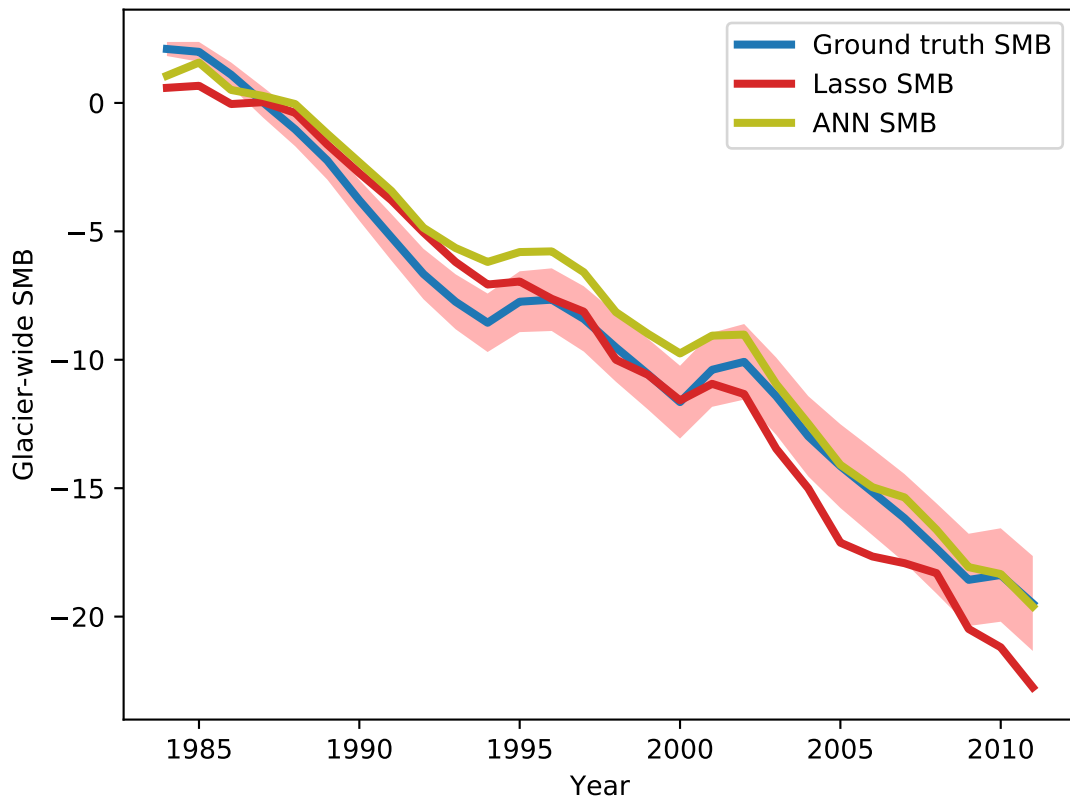

## Glacier de Rochemelon

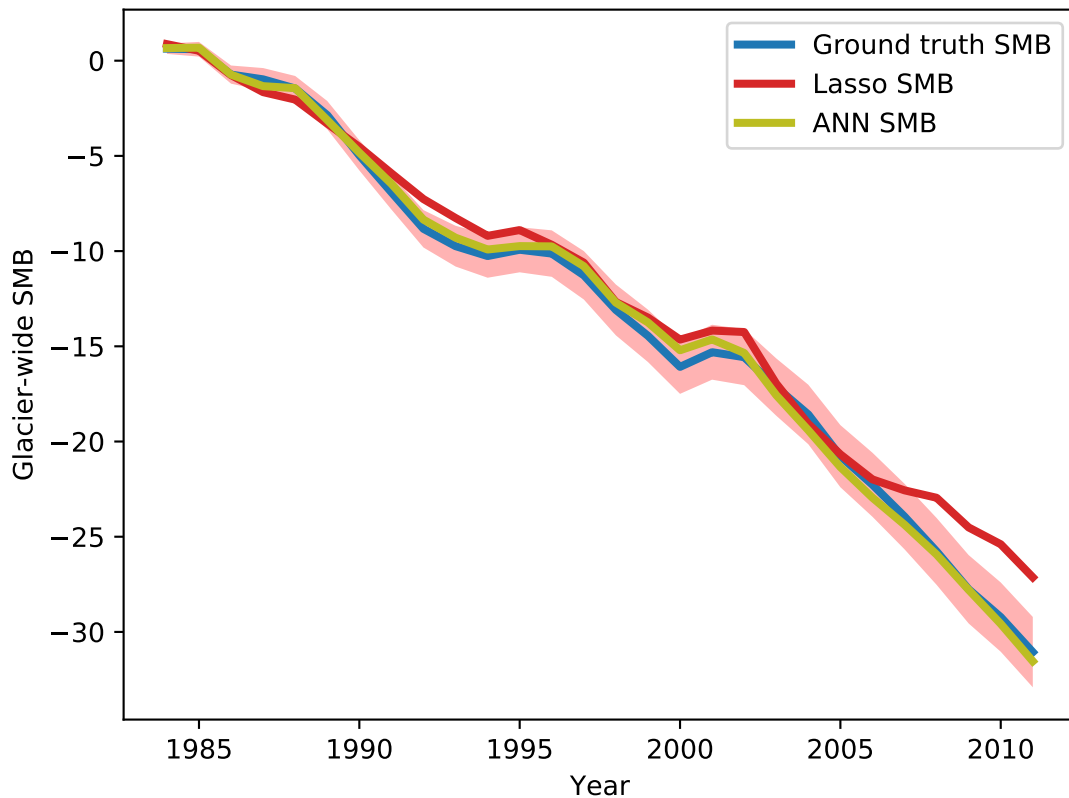

## Glacier Baounet 1

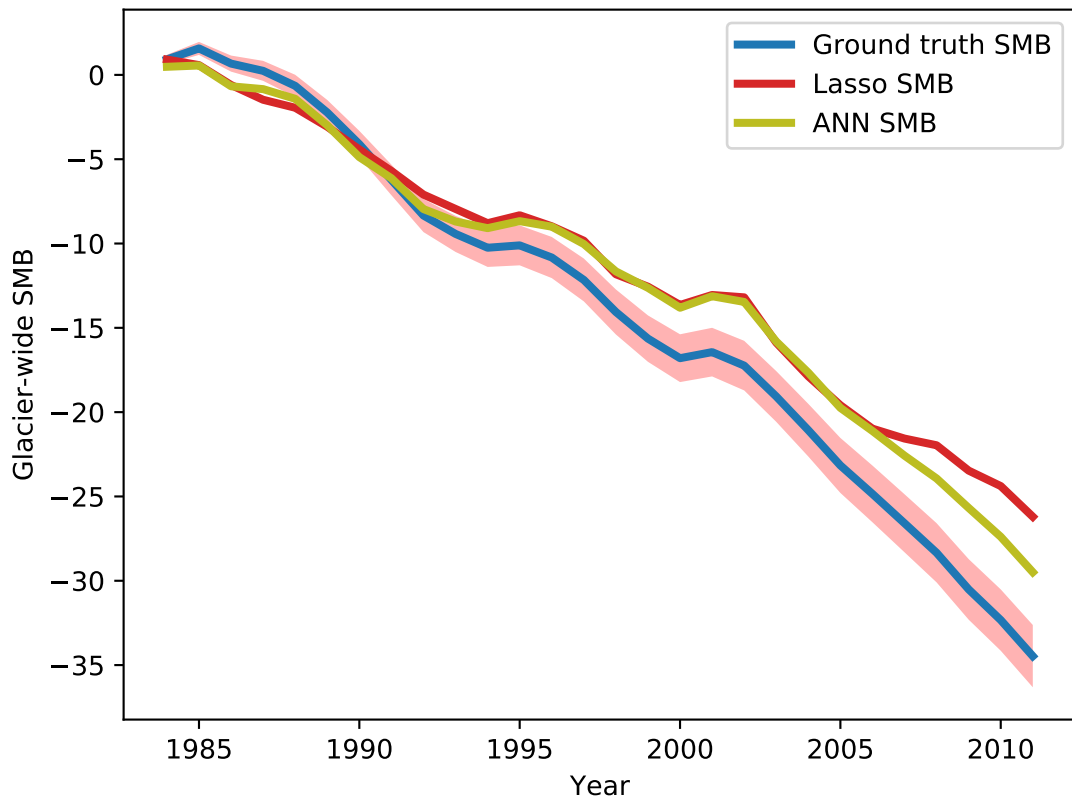

Glacier du Grand Mean Nord 1

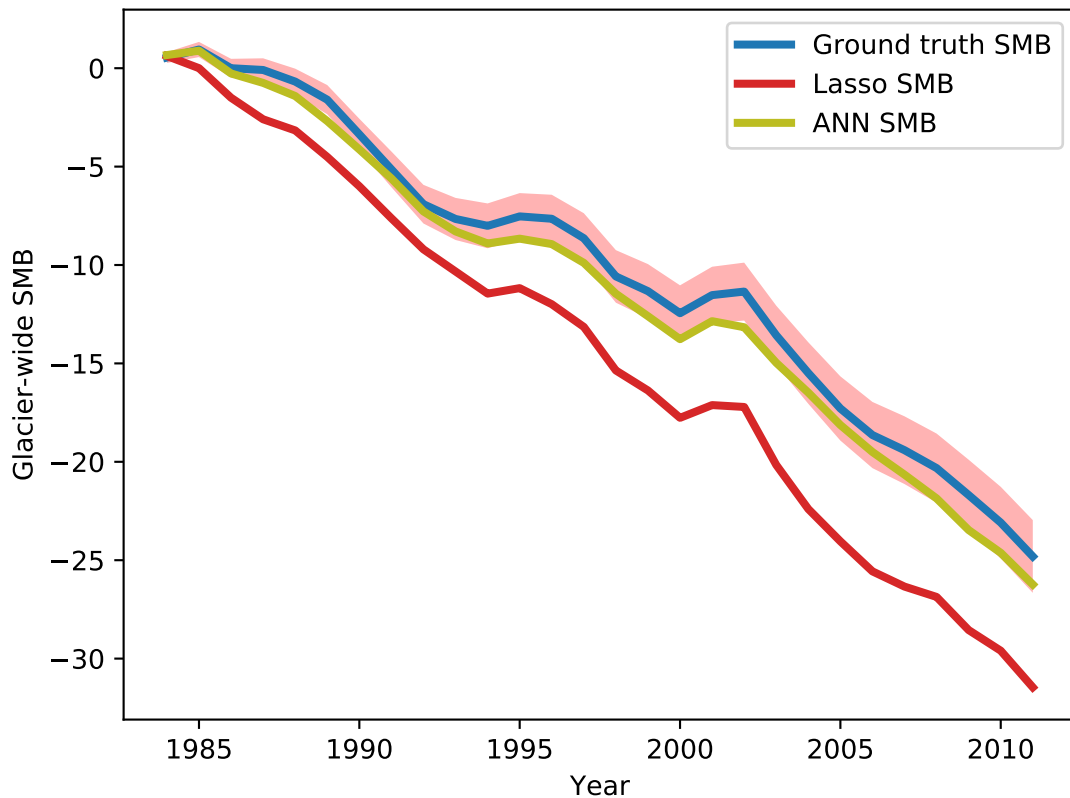

## Glacier du Mulinet

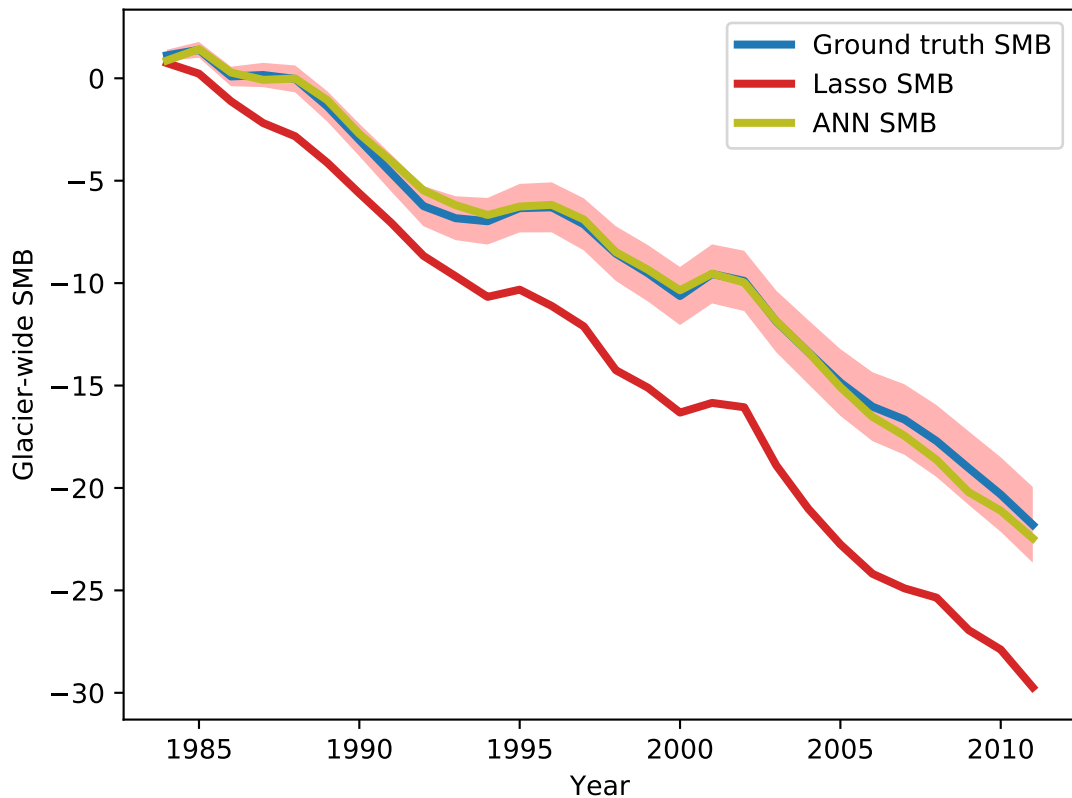

## Glacier de la Sassiére

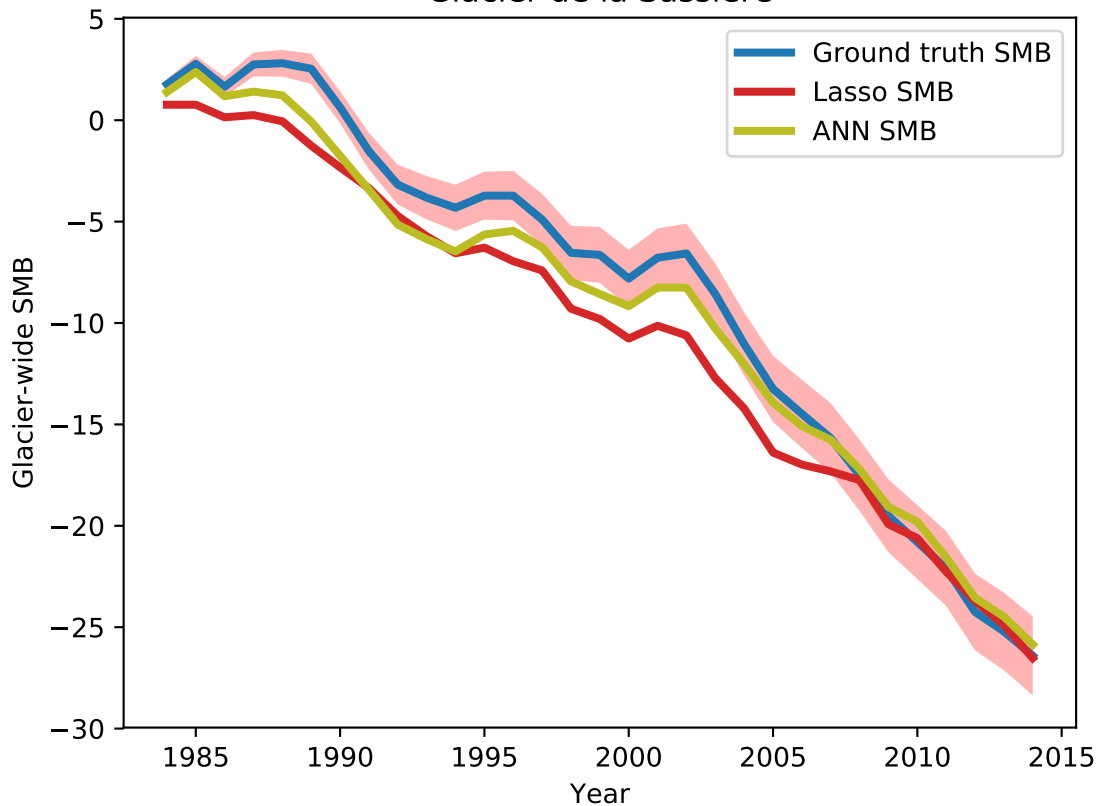

## Glacier de la Savinaz

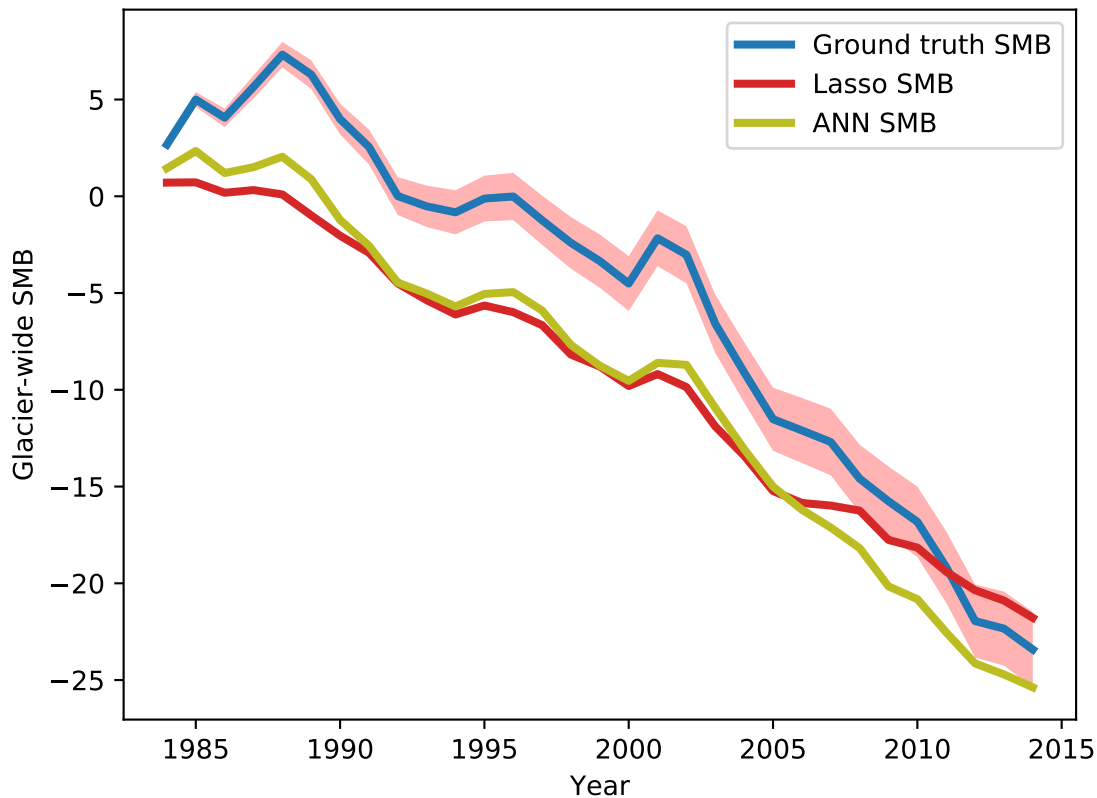

## Glacier de la Gurratz

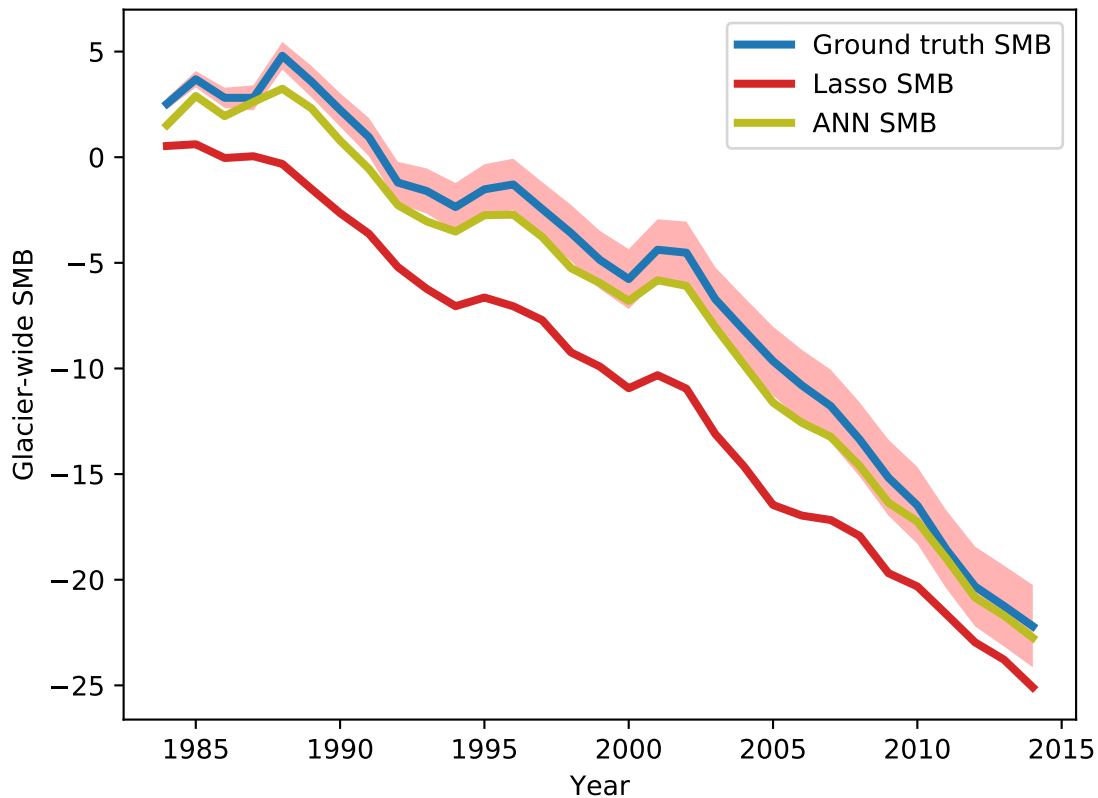

## Glacier de Tre la Tete 1

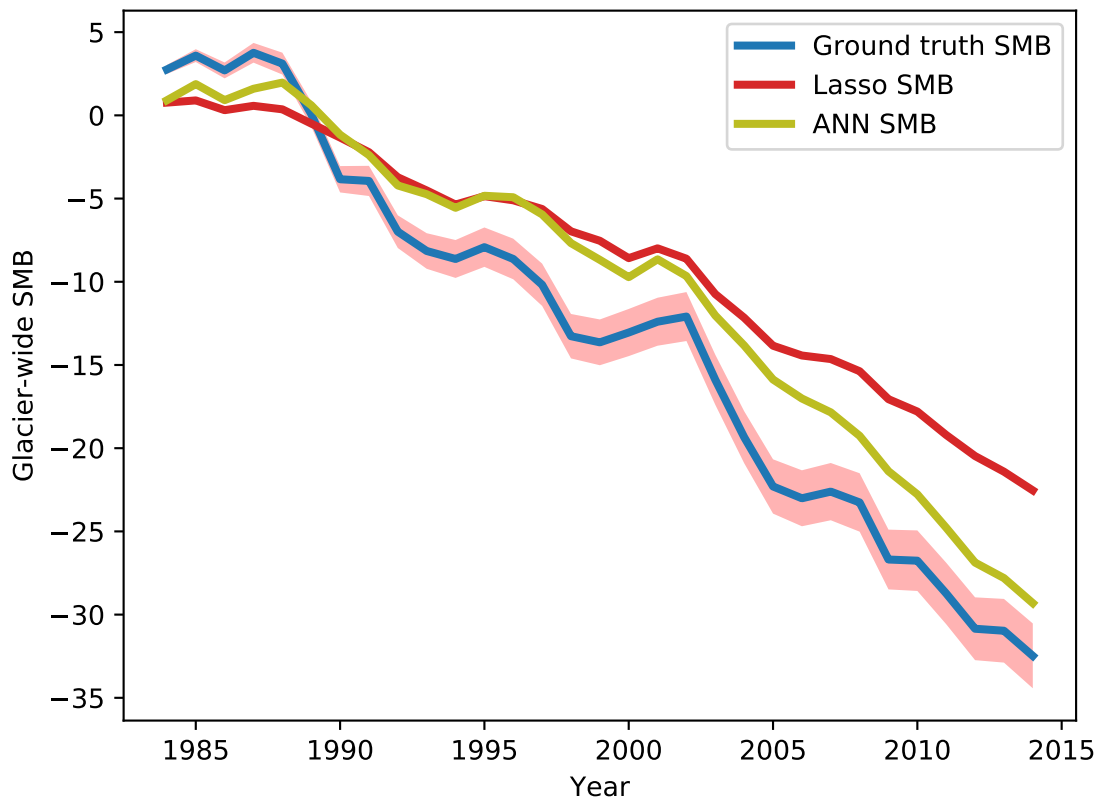

## Glacier de Talefre

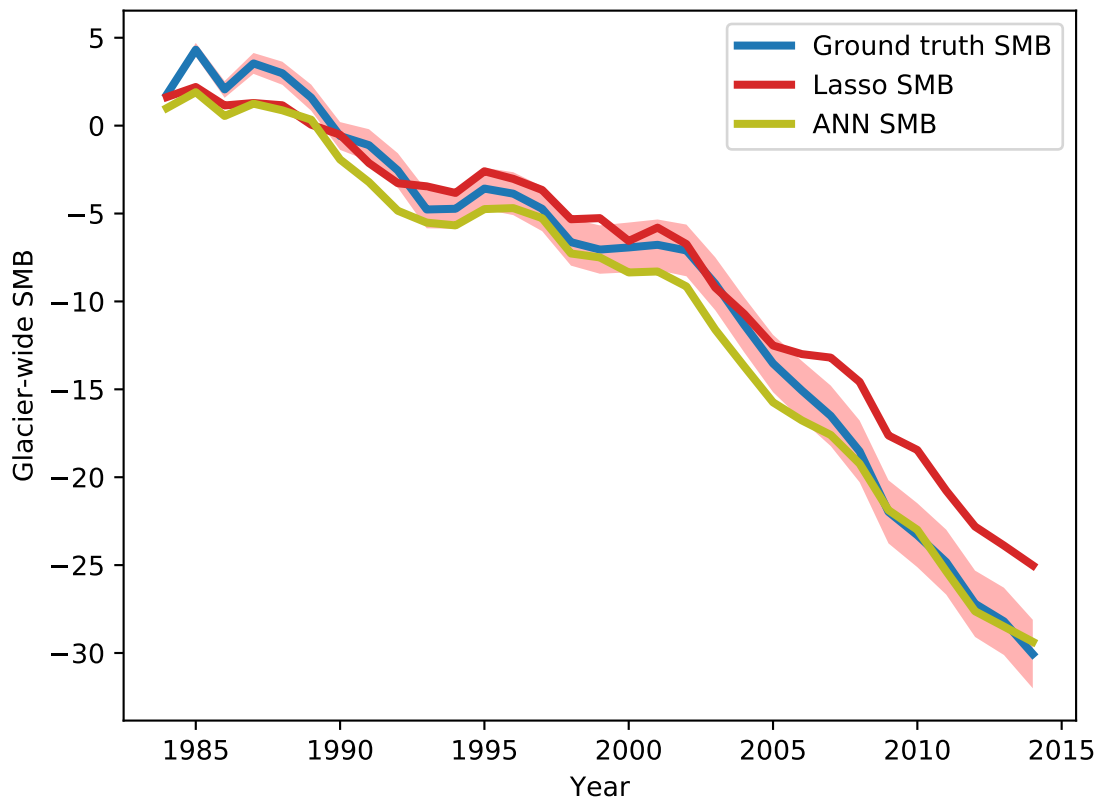

## Glacier du Tour

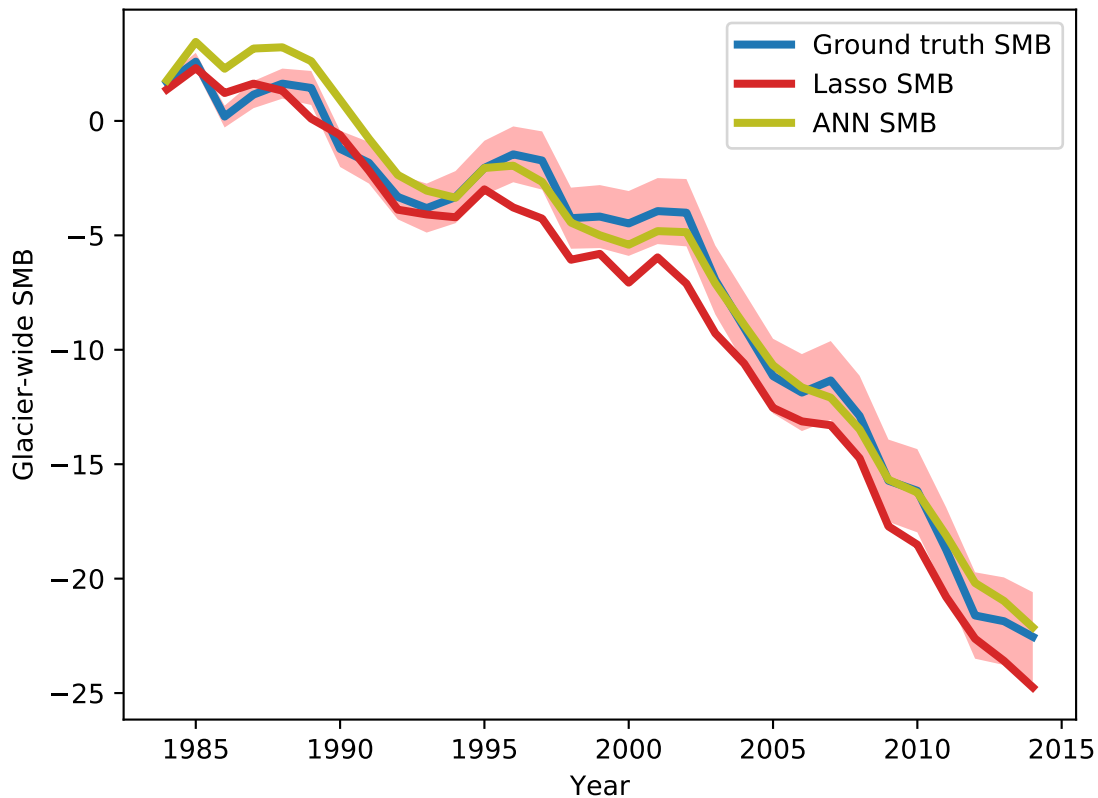

## Glacier d'Argentiere

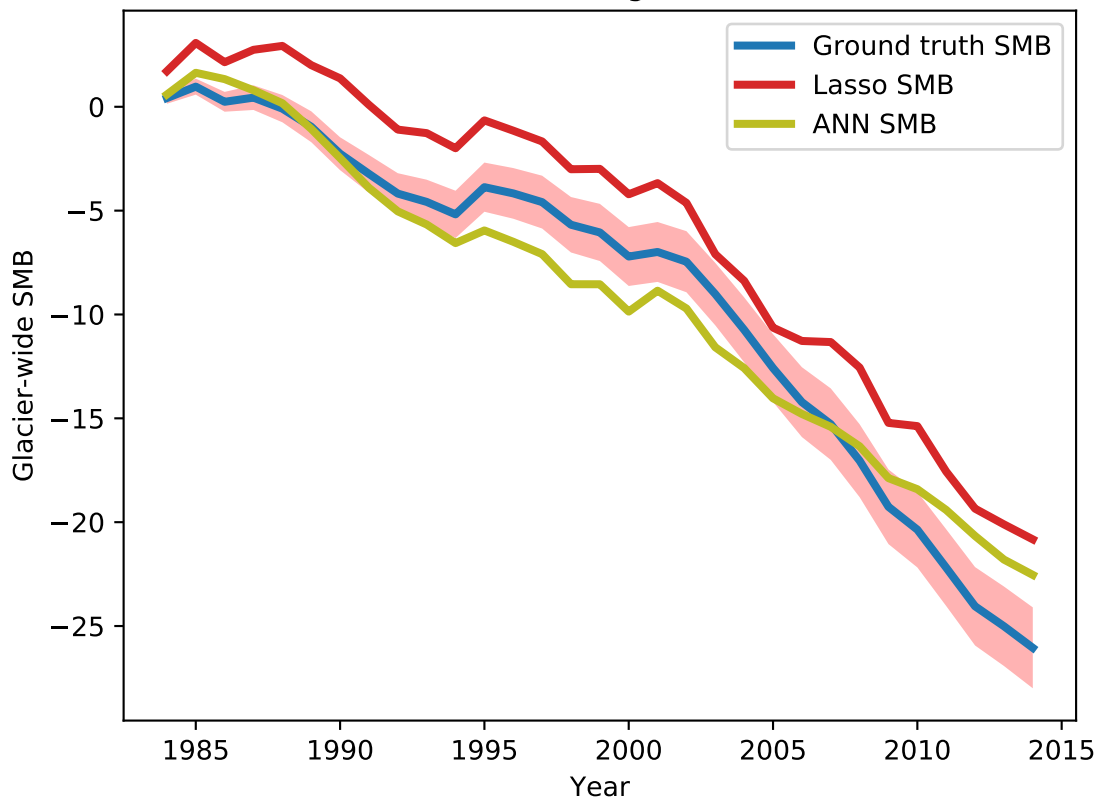

Supplement: Supplementary file 1 [file tc-2019-163-supplement.zip › SMB_lasso_ANN_no_weights_SMB_simulations.pdf]
