# Supplementary material for: Deep learning applied to glacier evolution modelling
Source: Copernicus journal article supplement (doi:10.5194/tc-2019-163), 2019-07-26
Supplement: Supplementary file 1 [file tc-2019-163-supplement.zip]

Archive with 3 entries (3 files):
- glacier_data_2015.csv
- SMB_lasso_ANN_no_weights_SMB_simulations.pdf
- Bolibar_et_al_Supplementary_material_TCD.pdf
