# Supplementary material for: Deep learning applied to glacier evolution modelling
Source: Copernicus journal article supplement (doi:10.5194/tc-2019-163), 2019-07-26
Supplement: Supplementary file 1 [file tc-2019-163-supplement.zip › glacier_data_2015.csv]

Area	Perimeter	Glacier	Annee	Massif	MEAN_Pixel	MIN_Pixel	MAX_Pixel	MEDIAN_Pix	Length	Aspect	x_coord	y_coord	slope20	GLIMS_ID	Massif_SAFRAN	Aspect_num	SMB years
28.869	135.51	Mer de Glace 1	2015	Mont Blanc	2868.590752	1551	4016	2992	13115.45043	NW	6.933983033	45.87542493	8	G006934E45883N	3	315	1980 - 2015
1.7607	15.6429	des Quirlies	2015	Grandes Rousses	2961.556974	2592	3364	2939	2311.32366	ENE	6.146946041	45.14205087	12	G006149E45143N	12	90	1984 - 2014
2.069	17.7762	Saint Sorlin	2015	Grandes Rousses	2922.27851	2674	3413	2893	2631.71657	NE	6.159785336	45.15974323	9	G006159E45160N	12	45	1959 - 2015
1.2354	9.5772	des Rouies	2015	Ecrins	3284.512953	2943	3516	3313	2177.2239	NE	6.26238473	44.87219809	19	G006275E44878N	15	45	1984 - 2014
2.2626	22.7411	de la Pilatte	2015	Ecrins	2933.053571	2360	3408	2984.5	2898.40755	N	6.33778816	44.85739492	18	G006334E44865N	16	0	1984 - 2014
1.4234	12.8461	du Sele	2015	Ecrins	3005.452381	2534	3313	3063.5	2824.14868	NE	6.366165044	44.86126257	17	G006367E44861N	16	45	1984 - 2014
0.6728	7.828	du vallon de la Pilatte	2015	Ecrins	3446.417062	3089	3745	3456.5	1330.1198	SW	6.349101393	44.91918075	28	G006347E44919N	16	225	1984 - 2014
4.703	29.7331	Blanc	2015	Ecrins	3196.086897	2456	3748	3187	5735.97133	E	6.37647643	44.93782946	16	G006382E44944N	16	90	1984 - 2014
0.8677	8.5221	du Casset	2015	Ecrins	3189.493554	2771	3597	3171	1882.63383	NNE	6.438095622	44.95623338	30	G006439E44956N	16	0	1984 - 2014
1.2739	11.3878	de la Selle	2015	Ecrins	3186.755975	2942	3769	3128	2072.31863	NNW	6.277185655	44.99213459	15	G006256E44974N	15	225	1984 - 2014
2.7093	20.5276	de Mont de Lans	2015	Ecrins	3233.621302	2849	3499	3258	2146.67103	NW	6.219631612	45.00086996	25	G006226E45003N	15	315	1984 - 2014
4.6497	21.7568	de la Girose	2015	Ecrins	3223.742847	2708	3579	3244	2761.20914	N	6.252386693	45.00526327	23	G006252E45009N	15	0	1984 - 2014
1.21	7.4076	du Lautaret	2015	Ecrins	3038.369352	2567	3512	3034	1830.12484	N	6.333750036	45.00464717	23	G006339E45007N	15	45	1984 - 2014
2.8701	20.6379	de Gebroulaz	2015	Vanoise	3022.778463	2603	3480	3016	4497.77755	N	6.631740529	45.28976706	11	G006629E45295N	10	0	1984 - 2015
3.1645	15.8007	de l'Arpont	2015	Vanoise	3291.921739	2738	3581	3338	2841.99896	ESE	6.752981315	45.32144196	14	G006756E45318N	10	90	1984 - 2014
2.6743	12.3823	du Pelve 1	2015	Vanoise	3232.531022	2754	3525	3253	3093.21578	ENE	6.75620236	45.3424762	16	G006763E45344N	10	90	1984 - 2014
2.3452	11.2555	de l'Arcellin - Roche Ferran 1	2015	Vanoise	3050.749035	2814	3223	3053	2799.38772	N	6.781959772	45.36757727	19	G006780E45369N	10	0	1984 - 2014
2.24	8.2921	de la Mahure 1	2015	Vanoise	2985.315141	2662	3289	2973.5	2345.07412	E	6.748674528	45.29611832	21	G006745E45302N	10	90	1984 - 2014
3.1526	20.1183	de la Grande Motte	2015	Vanoise	3025.985082	2661	3634	2965	3437.85958	NNW	6.881090788	45.42057731	14	G006881E45423N	10	0	1984 - 2014
1.8769	10.9405	du Vallonnet	2015	Vanoise	3282.271616	3019	3498	3286	1798.92481	NNE	6.909524973	45.33308978	21	G006904E45335N	6	0	1984 - 2014
1.3711	12.782	de Rochemelon	2015	Haute Maurienne	3130.317961	2935	3261	3155	2484.25297	NW	7.070060444	45.21873727	11	G007067E45221N	11	315	1984 - 2014
1.35	7.8954	Baounet 1	2015	Haute Maurienne	3018.423803	2801	3283	3014	2639.28057	NW	7.120765525	45.25317405	9	G007117E45255N	11	315	1984 - 2014
1.3635	11.6501	du Grand Mean Nord 1	2015	Vanoise	3082.422141	2874	3327	3087	2218.03708	WNW	7.147492616	45.36144149	8	G007143E45363N	11	270	1984 - 2014
1.7369	9.8408	du Mulinet	2015	Haute Maurienne	3083.782732	2850	3302	3086	1762.03611	NW	7.151939537	45.3768116	8	G007144E45371N	11	315	1984 - 2014
1.8699	8.814	de la Sassiere	2015	Haute Vallee de l'Isere	3258.275556	2852	3621	3274	2105.89748	NW	6.988557456	45.5106147	19	G006988E45515N	6	315	1984 - 2014
0.7574	7.2761	de la Savinaz	2015	Haute Vallee de l'Isere	3270.540839	2598	3556	3342	1857.63396	NE	6.87555174	45.51601365	23	G006880E45521N	6	90	1984 - 2014
1.583	10.2692	de la Gurraz	2015	Haute Vallee de l'Isere	3099.925926	2481	3563	3094	2801.79007	NE	6.872276039	45.52580102	21	G006874E45531N	6	45	1984 - 2014
7.39	59.614	de Tre la Tete 1	2015	Mont Blanc	2961.664305	2015	3862	3010	7504.53162	WSW	6.788449586	45.79351082	10	G006784E45784N	6	270	1984 - 2014
6.6518	44.5737	de Talefre	2015	Mont Blanc	2998.272771	2499	3724	3009.5	4625.77008	WSW	6.988770455	45.91560942	10	G006992E45913N	3	270	1984 - 2014
6.91	33.7416	du Tour	2015	Mont Blanc	3005.659011	2413	3539	2995	4532.73572	NW	6.996872584	45.98340017	16	G006988E45987N	3	315	1984 - 2014
10.07	46.3888	d'Argentiere	2015	Mont Blanc	2808.363893	2196	4093	2820	3084.8895	NW	6.996976498	45.94140032	11	G006985E45951N	3	315	1976 - 2015
0.047	1.5839	Sarennes 1	2015	Grandes Rousses	2928.666667	2885	3027	2921	462.94258	SSW	6.132130041	45.11630653	10	G006129E45117N	12	180	1959 - 2015
